# Supplementary material
Source: PubMed Central journal article supplement (PMC8825884)
Supplement: NIHMS1725105-supplement-sm4fig.pdf [file NIHMS1725105-supplement-sm4fig.pdf]

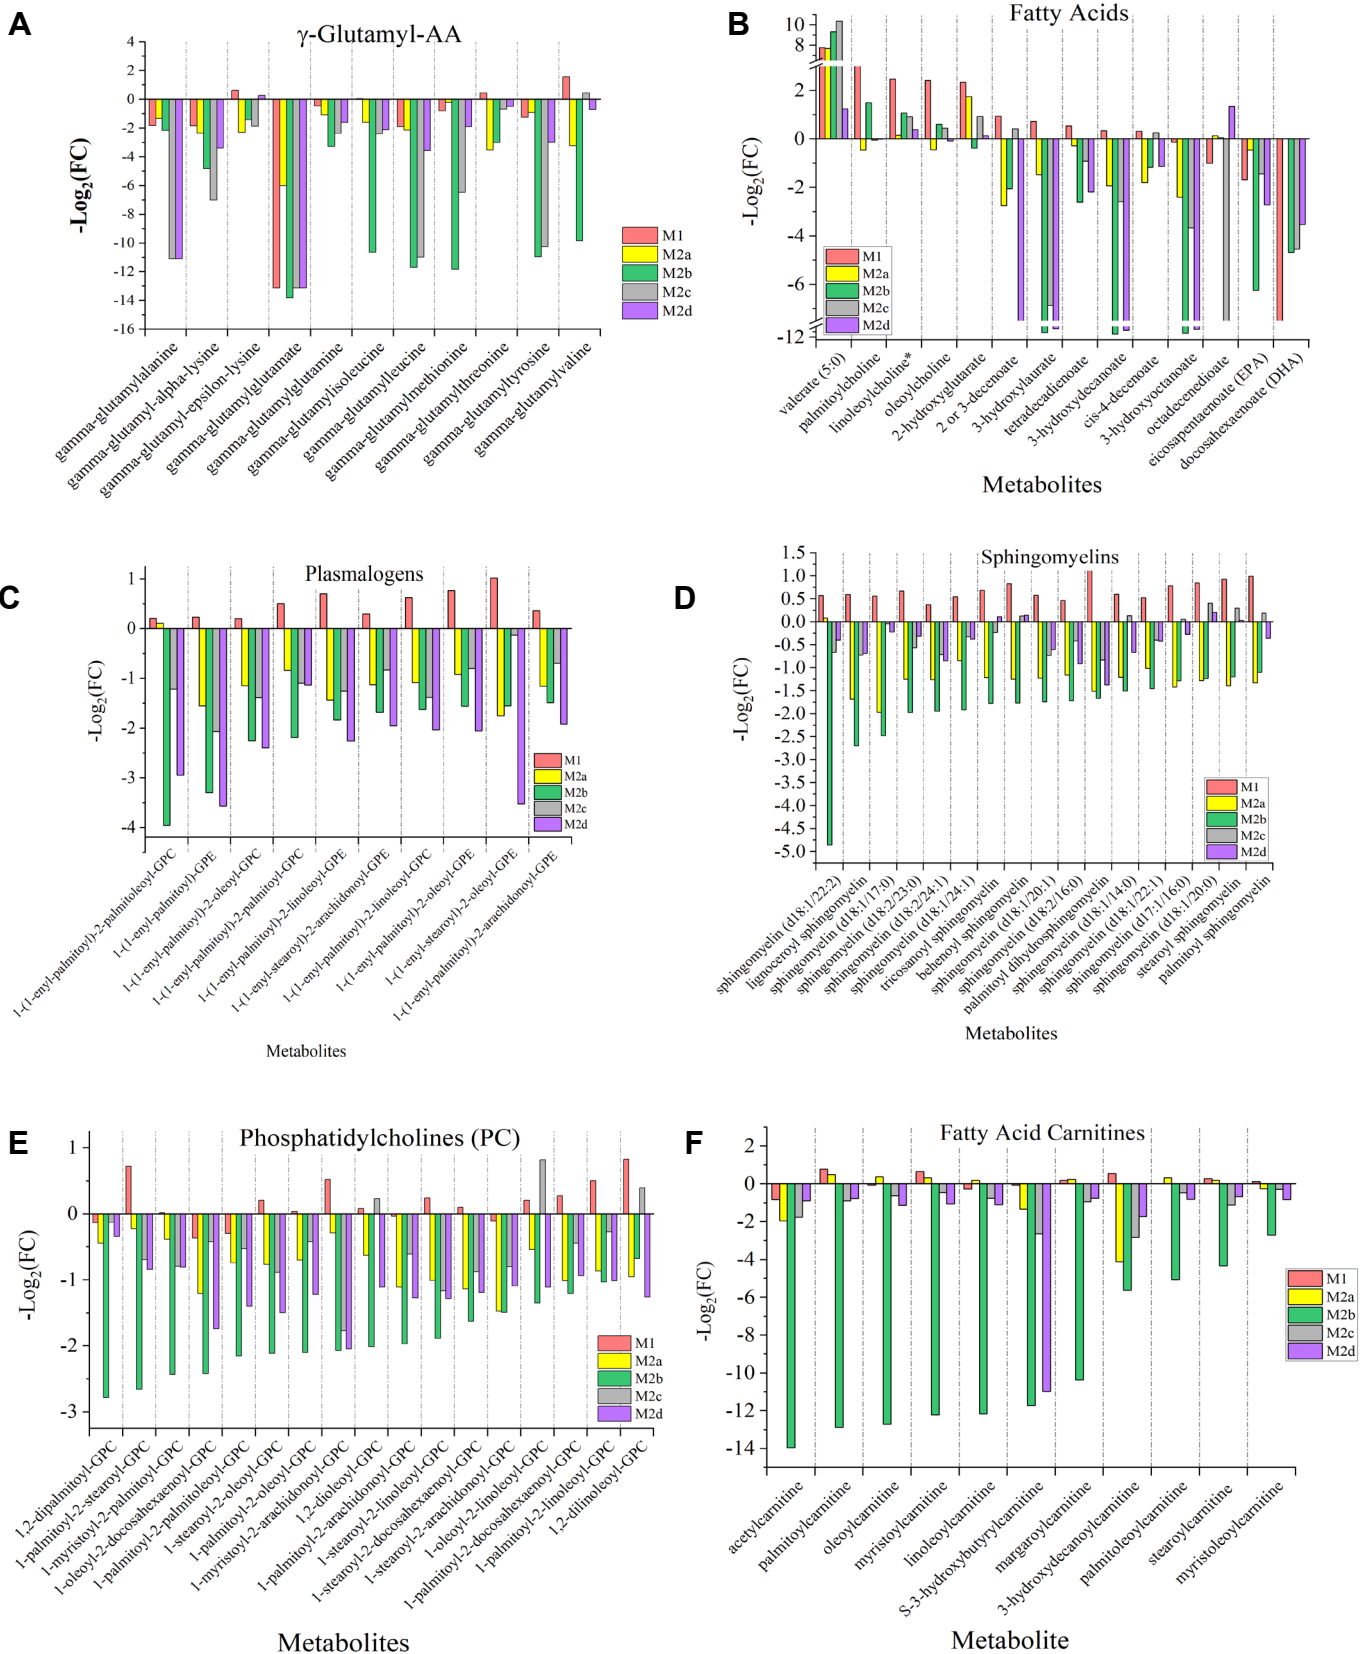

**Supplemental Figure 4: Untargeted Metabolomics of Five Polarized M $\Phi$  Phenotypes Identifies Phenotypic Differences in  $\gamma$ -Glutamyl Amino Acid Metabolism and Lipid Metabolism Relative to the Parent, Resting M $\Phi$  Phenotype.** Histogram plots depict the accumulation of (positive  $-\text{Log}_2\text{FC}$  bars) or decrease of (negative  $-\text{Log}_2\text{FC}$  bars) lipid metabolites for the M1 M $\Phi$ s (IFN- $\gamma$ /LPS treated, shown in red), M2a M $\Phi$ s (IL-4/IL-13 treated, shown in yellow), M2b M $\Phi$ s (IC/LPS treated, shown in green), M2c M $\Phi$ s (IL-10 treated, shown in gray), and M2d M $\Phi$ s (IL-6/LIF treated, shown in purple) relative to the M0 parent cells. The represented metabolic classifications include  $\gamma$ -glutamyl amino acids (A), fatty acids (B), plasmalogens (C), sphingomyelins (D), phosphatidylcholines (PC) (E), and fatty acid carnitines (F).
